# Supplementary material
Source: PubMed Central journal article supplement (PMC2596729)
Supplement: NIHMS63179-supplement-1si20060123_02.pdf [file NIHMS63179-supplement-1si20060123_02.pdf]

## Supporting Information

### Balancing Solvation and Intramolecular Interactions: Towards a Consistent Generalized Born Force Field

Jianhan Chen, Wonpil Im and Charles L. Brooks III

Department of Molecular Biology

The Scripps Research Institute

10550 North Torrey Pines Road

La Jolla, CA 92037, USA

1. The complete list of authors for the Reference. 65, A. D. MacKerell, Jr. *et al.*, *J. Phys. Chem. B*, 102:3586–3616, 1998.

A. D. MacKerell, Jr., D. Bashford, M. Bellott, R. L. Dunbrack, J. D. Evanseck, M. J. Field, S. Fischer, J. Gao, H. Guo, S. Ha, D. Joseph-McCarthy, L. Kuchnir, K. Kuczera, F. T. K. Lau, C. Mattos, S. Michnick, T. Ngo, D. T. Nguyen, B. Prodhom, W. E. Reiher, III, B. Roux, M. Schlenkrich, J. C. Smith, R. Stote, J. Straub, M. Watanabe, J. Wiorcikiewicz-Kuczera, D. Yin, and M. Karplus. *J. Phys. Chem. B*, 102:3586–3616, 1998.

Supplementary Material: dimer configurations

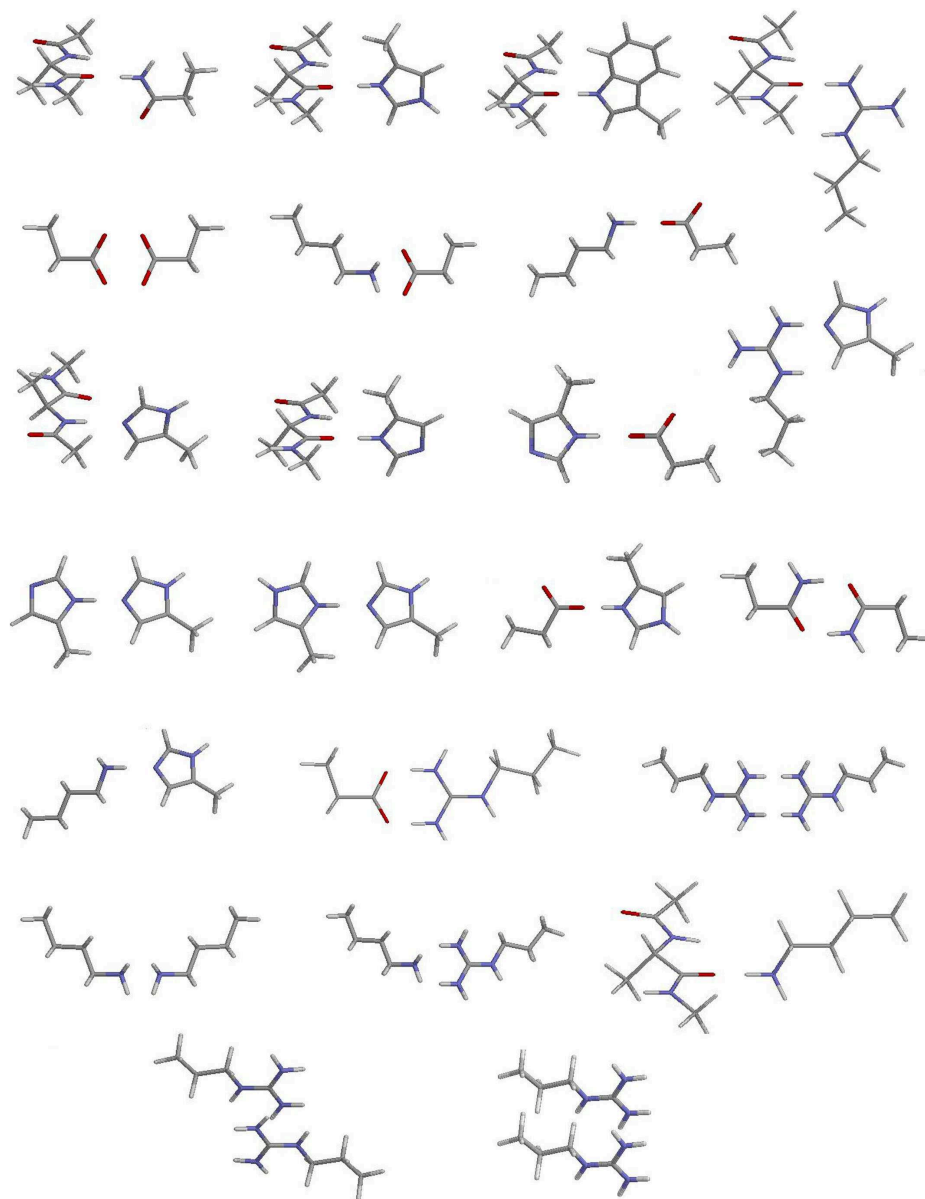

Figure 1: All 23 dimer configurations examined in current study.
